# Supplementary material for: Noise-induced hippocampal damage: potential mechanisms
Source: PubMed Central journal article supplement — Neural Regen Res. 2021 Aug 4;17(3):563–4. doi: 10.4103/1673-5374.320982 (PMC8504372; doi:10.4103/1673-5374.320982), 2021-08-04
Supplement: NRR-17-563_Suppl2.pdf [file NRR-17-563_Suppl2.pdf]

## OPEN PEER REVIEW REPORT 2

**Name of journal:** Neural Regeneration Research

**Manuscript NO:** NRR-D-00153

**Title:** Noise-induced hippocampal damage: potential mechanisms

**Reviewer's Name:** Bryan E. Kolb

**Reviewer's country:** Canada

### COMMENTS TO AUTHORS

This is a straight forward review of a topic of growing interest and importance. The author covers the topic as well as possible in such a brief review.

One minor point that the authors might consider: given the changes in brain that they summarize, they might consider that those changes can change behavior, which in turn can also change the hippocampus. Thus, it is important to study the changes in behavior, including sleep.

Another minor point is related to neurogenesis in hippocampus. The authors do mention this but they could expand on how stress can reduce neurogenesis. Along this line, aging also reduces neurogenesis and presumably the interaction of the noise stress and aging could be important.
